# Supplementary material for: Impaired HDL2-mediated cholesterol efflux is associated with metabolic syndrome in families with early onset coronary heart disease and low HDL-cholesterol level
Source: PLoS One. 2017 Feb 16;12(2):e0171993. doi: 10.1371/journal.pone.0171993 (PMC5313225; doi:10.1371/journal.pone.0171993)
Supplement: S1 Dataset — (XLSX) [file pone.0171993.s003.xlsx]

## Sheet: Variables
Variable	Description	Values / Units
FAMILYREL	Family relation status of a subject in a family	1 = family proband; 2 = biological relative of a proband
SEX	Gender	0 = man; 1 = woman
AGE	Age	years
METS	Metabolic syndrome	1 = non-affected; 2 = affected
HTA	Hypertension	1 = non-affected; 2 = affected
DM	Diabetes	1 = non-affected; 2 = affected
CHD	Coronary heart disease	1 = non-affected; 2 = affected
CHDAGE	Age at the diagnosis of CHD	years
EARLY_CHD	Premature coronary heart disease (age at the diagnosis under 60 years)	0 = non-affected; 1 = affected
EARLY_CHD_age	Premature coronary heart disease (age at the diagnosis under 60 years) in subjects over 35 years of age	0 = non-affected; 1 = affected
STATIN	Statin medication	0 = not using; 1 = using
ACEATII	ACE-inhibitor or angiotensin II -receptor blocking medication	1 = not using; 2 = using
DM_MED	Medication for diabetes (marked only for subjects with diabetes)	0 = not using; 1 = using
SMOKER	Smoking status	1 = non-smoker; 2 = ex-smoker; 3 = current smoker
ALCOHOL	Alcohol intake	doses (12 g of ethanol) / week
PACKYEARS	Pack-years	pack-year = years smoked x packs (20 cigarettes) smoked per day
WAIST	Waist circumference	cm
BMI	Body mass index	kg/m2
BPsys	Systolic blood pressure	mmHg
BPdia	Diastolic blood pressure	mmHg
GLUCOSE	Fasting plasma glucose concentration	mmol/L
LOG_GLUCOSE	log-transformation of GLUCOSE
INSULIN	Serum insulin concentration	mU/L
LOG_INSULIN	log-transformation of INSULIN
HOMA	Homeostatic model assesment index of insulin resistance = fasting blood insulin (mU/L) x fasting blood glucose (mmol/L) / 22.5	mU/L of insulin x mmol/L of glucose
LOG_HOMA	log-transformation of HOMA
TOT_CHOL	Plasma total cholesterol concentration	mmol/L
HDLC	Plasma HDL-cholesterol concentration	mmol/L
LOG_HDLC	log-transformation of HDLC
LDLC	Plasma LDL-cholesterol concentration	mmol/L
TG	Plasma total triglycerides level	mmol/L
LOG_TG	log-transformation of TG
FFA	Plasma fasting free fatty acids	mmol/L
ALT	Plasma alanine transaminase activity	U/L
CREATININE	Plasma creatinine concentration	µmol/L
TOT_ADIPONECTIN	Plasma total adiponectin concentration	mg/L
LOG_TOT_ADIPONECTIN	log-transformation of TOT_ADIPONECTIN
HMW_ADIPONECTIN	Plasma high-molecular weight adiponectin concentration	mg/L
LOG_HMW_ADIPONECTIN	log-transformation of HMW_ADIPONECTIN
AUC_HDL3	Area under HDL3 curve in total HDL electrophoresis	relative unit
AUC_HDL2	Area under HDL2 curve in total HDL electrophoresis	relative unit
PEAKLOC_HDL3	Relative HDL3 peak location (0...1) in total HDL electrophoresis	relative unit
PEAKLOC_HDL2	Relative HDL2 peak location (0...1) in total HDL electrophoresis	relative unit
HDL3_ratio	Ratio (0...1) of HDL3 protein amount to total HDL protein amount in electrophoresis = AUC_HDL3 / (AUC_HDL3 + AUC_HDL2)
HDL2_ratio	Ratio (0...1) of HDL2 protein amount to total HDL protein amount in electrophoresis = AUC_HDL2 / (AUC_HDL3 + AUC_HDL2)
PREBETA37	Percentage of pre-beta apoA-I of serum total apoA-I in electrophoresis after incubating serum for 16h at 37°C temperature	%
PON1act	Paraoxonase-1 activity in serum	µmol/min
LOG_PON1act	log-transformation of PON1act
PLTPact	Phospholipid transfer protein activity in serum	nmol/mL/h
PLTPmass	Phospholipid transfer protein mass in serum	µg/mL
CETPact	Cholesterol ester transfer protein activity in serum	nmol/mL/h
LCATact	Lecithin-cholesterol acyltransferase activity in serum	nmol/mL/h
HDLefflux	Cholesterol efflux from THP-1 macrophages to study subjects' total HDL fraction	%
HDL2efflux	Cholesterol efflux from THP-1 macrophages to study subjects' HDL2 fraction	%
HDL3efflux	Cholesterol efflux from THP-1 macrophages to study subjects' HDL3 fraction	%
SERUMefflux	Cholesterol efflux from THP-1 macrophages to study subjects' serum	%
UCF_HDL_C	Relative plasma concentration of total HDL cholesterol. Not corrected for wastage in the ultracentrifugation (UCF) to absolute plasma concentration (mmol/L)	relative unit
UCF_HDL_TG	Relative plasma concentration of total HDL triglycerides. Not corrected for wastage in the ultracentrifugation (UCF) to absolute plasma concentration (mmol/L)	relative unit
UCF_HDL_FC	Relative plasma concentration of total HDL free cholesterol. Not corrected for wastage in the ultracentrifugation (UCF) to absolute plasma concentration (mmol/L)	relative unit
UCF_HDL_EC	Relative plasma concentration of total HDL esterified cholesterol. Not corrected for wastage in the ultracentrifugation (UCF) to absolute plasma concentration (mmol/L)	relative unit
UCF_HDL_PL	Relative plasma concentration of total HDL phospholipids. Not corrected for wastage in the ultracentrifugation (UCF) to absolute plasma concentration (mmol/L)	relative unit
UCF_HDL_protein	Relative plasma concentration of total HDL protein. Not corrected for wastage in the ultracentrifugation (UCF) to absolute plasma concentration (g/L)	relative unit
UCF_HDL_C_prot	Ratio of total cholesterol to protein in total HDL fraction = UCF_HDL_C (mmol/L) / UCF_HDL_protein (g/L)	(mmol/L of lipid)/(g/L of protein)
UCF_HDL_TG_prot	Ratio of triglycerides to protein in total HDL fraction = UCF_HDL_TG (mmol/L) / UCF_HDL_protein (g/L)	(mmol/L of lipid)/(g/L of protein)
UCF_HDL_FC_prot	Ratio of free cholesterol to protein in total HDL fraction = UCF_HDL_FC (mmol/L) / UCF_HDL_protein (g/L)	(mmol/L of lipid)/(g/L of protein)
UCF_HDL_EC_prot	Ratio of esterified cholesterol to protein in total HDL fraction = UCF_HDL_EC (mmol/L) / UCF_HDL_protein (g/L)	(mmol/L of lipid)/(g/L of protein)
UCF_HDL_PL_prot	Ratio of phospholipids to protein in total HDL fraction = UCF_HDL_PL (mmol/L) / UCF_HDL_protein (g/L)	(mmol/L of lipid)/(g/L of protein)
UCF_HDL2_C	Relative plasma concentration of HDL2 cholesterol. Not corrected for wastage in the ultracentrifugation (UCF) to absolute plasma concentration (mmol/L)	relative unit
UCF_HDL2_TG	Relative plasma concentration of HDL2 triglycerides. Not corrected for wastage in the ultracentrifugation (UCF) to absolute plasma concentration (mmol/L)	relative unit
UCF_HDL2_FC	Relative plasma concentration of HDL2 free cholesterol. Not corrected for wastage in the ultracentrifugation (UCF) to absolute plasma concentration (mmol/L)	relative unit
UCF_HDL2_EC	Relative plasma concentration of HDL2 esterified cholesterol. Not corrected for wastage in the ultracentrifugation (UCF) to absolute plasma concentration (mmol/L)	relative unit
UCF_HDL2_PL	Relative plasma concentration of HDL2 phospholipids. Not corrected for wastage in the ultracentrifugation (UCF) to absolute plasma concentration (mmol/L)	relative unit
UCF_HDL2_protein	Relative plasma concentration of HDL2 protein. Not corrected for wastage in the ultracentrifugation (UCF) to absolute plasma concentration (g/L)	relative unit
UCF_HDL2_C_prot	Ratio of total cholesterol to protein in HDL2 fraction = UCF_HDL2_C (mmol/L) / UCF_HDL2_protein (g/L)	(mmol/L of lipid)/(g/L of protein)
LOG_UCF_HDL2_C_prot	log-transformation of UCF_HDL2_C_prot
UCF_HDL2_TG_prot	Ratio of triglycerides to protein in HDL2 fraction = UCF_HDL2_TG (mmol/L) / UCF_HDL2_protein (g/L)	(mmol/L of lipid)/(g/L of protein)
LOG_UCF_HDL2_TG_prot	log-transformation of UCF_HDL2_TG_prot
UCF_HDL2_FC_prot	Ratio of free cholesterol to protein in HDL2 fraction = UCF_HDL2_FC (mmol/L) / UCF_HDL2_protein (g/L)	(mmol/L of lipid)/(g/L of protein)
LOG_UCF_HDL2_FC_prot	log-transformation of UCF_HDL2_FC_prot
UCF_HDL2_EC_prot	Ratio of esterified cholesterol to protein in HDL2 fraction = UCF_HDL2_EC (mmol/L) / UCF_HDL2_protein (g/L)	(mmol/L of lipid)/(g/L of protein)
LOG_UCF_HDL2_EC_prot	log-transformation of UCF_HDL2_EC_prot
UCF_HDL2_PL_prot	Ratio of phospholipids to protein in HDL2 fraction = UCF_HDL2_PL (mmol/L) / UCF_HDL2_protein (g/L)	(mmol/L of lipid)/(g/L of protein)
LOG_UCF_HDL2_PL_prot	log-transformation of UCF_HDL2_PL_prot
UCF_HDL3_C	Relative plasma concentration of HDL3 cholesterol. Not corrected for wastage in the ultracentrifugation (UCF) to absolute plasma concentration (mmol/L).	relative unit
UCF_HDL3_TG	Relative plasma concentration of HDL3 triglycerides. Not corrected for wastage in the ultracentrifugation (UCF) to absolute plasma concentration (mmol/L).	relative unit
UCF_HDL3_FC	Relative plasma concentration of HDL3 free cholesterol. Not corrected for wastage in the ultracentrifugation (UCF) to absolute plasma concentration (mmol/L).	relative unit
UCF_HDL3_EC	Relative plasma concentration of HDL3 esterified cholesterol. Not corrected for wastage in the ultracentrifugation (UCF) to absolute plasma concentration (mmol/L).	relative unit
UCF_HDL3_PL	Relative plasma concentration of HDL3 phospholipids. Not corrected for wastage in the ultracentrifugation (UCF) to absolute plasma concentration (mmol/L).	relative unit
UCF_HDL3_protein	Relative plasma concentration of HDL3 protein. Not corrected for wastage in the ultracentrifugation (UCF) to absolute plasma concentration (g/L).	relative unit
UCF_HDL3_C_prot	Ratio of total cholesterol to protein in HDL3 fraction = UCF_HDL3_C (mmol/L) / UCF_HDL3_protein (g/L)	(mmol/L of lipid)/(g/L of protein)
UCF_HDL3_TG_prot	Ratio of triglycerides to protein in HDL3 fraction = UCF_HDL3_TG (mmol/L) / UCF_HDL3_protein (g/L)	(mmol/L of lipid)/(g/L of protein)
UCF_HDL3_FC_prot	Ratio of free cholesterol to protein in HDL3 fraction = UCF_HDL3_FC (mmol/L) / UCF_HDL3_protein (g/L)	(mmol/L of lipid)/(g/L of protein)
UCF_HDL3_EC_prot	Ratio of esterified cholesterol to protein in HDL3 fraction = UCF_HDL3_EC (mmol/L) / UCF_HDL3_protein (g/L)	(mmol/L of lipid)/(g/L of protein)
UCF_HDL3_PL_prot	Ratio of phospholipids to protein in HDL3 fraction = UCF_HDL3_PL (mmol/L) / UCF_HDL3_protein (g/L)	(mmol/L of lipid)/(g/L of protein)
UCF_VLDL_C	Relative plasma concentration of VLDL cholesterol. Not corrected for wastage in the ultracentrifugation (UCF) to absolute plasma concentration (mmol/L).	relative unit
UCF_VLDL_TG	Relative plasma concentration of VLDL triglycerides. Not corrected for wastage in the ultracentrifugation (UCF) to absolute plasma concentration (mmol/L).	relative unit
UCF_VLDL_FC	Relative plasma concentration of VLDL free cholesterol. Not corrected for wastage in the ultracentrifugation (UCF) to absolute plasma concentration (mmol/L).	relative unit
UCF_VLDL_EC	Relative plasma concentration of VLDL esterified cholesterol. Not corrected for wastage in the ultracentrifugation (UCF) to absolute plasma concentration (mmol/L).	relative unit
UCF_VLDL_PL	Relative plasma concentration of VLDL phospholipids. Not corrected for wastage in the ultracentrifugation (UCF) to absolute plasma concentration (mmol/L).	relative unit
UCF_VLDL_protein	Relative plasma concentration of VLDL protein. Not corrected for wastage in the ultracentrifugation (UCF) to absolute plasma concentration (g/L).	relative unit
HDL_protein	Total HDL protein concentration in plasma corrected for wastage in the ultracentrifugation = UCF_HDL_protein x 1.51	g/L
VLDL_protein	VLDL protein concentration in plasma corrected for wastage in the ultracentrifugation = UCF_VLDL_protein x 1.11	g/L
VLDL_TG	VLDL triglycerides concentration in plasma corrected for wastage in the ultracentrifugation = UCF_VLDL_TG x 1.11	mmol/L
APOAI	Serum apoA-I concentration	g/L
HDL_APOE	Plasma concentration of apoE bound to HDL	mg/L
LOG_HDL_APOE	log-transformation of HDL_APOE
HDL_APOE_prot	Ratio of apoE to protein in HDL fraction = HDL_APOE / HDL_protein.	(mg/L of apoE in HDL)/(g/L of HDL-protein)
LOG_HDL_APOE_prot	log-transformation of HDL_APOE_prot

## Sheet: Data
FAMILYREL	SEX	AGE	METS	HTA	DM	CHD	CHDAGE	EARLY_CHD	EARLY_CHD_age	STATIN	ACEATII	DM_MED	SMOKER	ALCOHOL	PACKYEARS	WAIST	BMI	BPsys	BPdia	GLUCOSE	LOG_GLUCOSE	INSULIN	LOG_INSULIN	HOMA	LOG_HOMA	TOT_CHOL	HDLC	LOG_HDLC	LDLC	TG	LOG_TG	FFA	ALT	CREATININE	TOT_ADIPONECTIN	LOG_TOT_ADIPONECTIN	HMW_ADIPONECTIN	LOG_HMW_ADIPONECTIN	AUC_HDL3	AUC_HDL2	PEAKLOC_HDL3	PEAKLOC_HDL2	HDL3_ratio	HDL2_ratio	PREBETA37	PON1act	LOG_PON1act	PLTPact	PLTPmass
2	0	50	1	1	1	1		0	0	0	1		2	0	12	89	25.31	115	68	5.3	0.724	5.2	0.716	1.23	0.09	5	1.16	0.064	3	1.53	0.185	0.33	30	90	4.7	0.672	0.44	-0.356	22260.5	3279.6	0.557	0.332	0.872	0.128	34	5.2	0.716	6423	7.35
2	0	62	1	1	1	1		0	0	1	1		2	4	11	93.5	27.23	112	73	5.5	0.74	4.2	0.623	1.031	0.013	4.7	2.12	0.326	2.4	0.68	-0.167	0.33	11	70	9.72	0.988	4.33	0.636	21286.6	10897.8	0.619	0.372	0.661	0.339	29	11.2	1.049	7617	6.27
2	0	33	1	1	1	1		0		0	1		3	4	1	91.5	27.01	120	82	6.3	0.799	5.8	0.763	1.631	0.213	4.5	1.26	0.1	3.3	1.02	0.009	0.37	35	70	3.95	0.596	1.04	0.017	25006.4	3358.6	0.633	0.396	0.882	0.118	29	57.8	1.762	7040	5.7
2	0	53	1	1	1	1		0	0	0	1		1	0	0	82	21.75	114	75	4.2	0.623	1.5	0.176	0.281	-0.551	3.7	1.39	0.143	2.1	0.35	-0.456	0.9	66	72	6.81	0.833	2.16	0.335	22886.1	9659.1	0.627	0.404	0.703	0.297	29	13.8	1.14	6195	6.17
2	0	51	1	1	1	1		0	0	0	1		3	2	14	97	28.51	120	83	5.9	0.771	5	0.699	1.317	0.12	5.4	1.07	0.029	3.8	1.23	0.09	0.36	17	94	4.52	0.655	1.05	0.019	16216.1	4187.7	0.641	0.365	0.795	0.205	36.4	17.1	1.233	7576	5.96
2	0	53	1	1	1	1		0	0	0	1		1	1	0	106	27.57	118	75	5.5	0.74	3.4	0.531	0.835	-0.078	5.3	1.22	0.086	3.6	0.98	-0.009	0.51	29	72	8.02	0.904	2.31	0.364	12671.3	3842.6	0.61	0.359	0.767	0.233	32.3	19	1.279	6018	4.82
2	0	26	1	1	2	1		0		1	1	1	1	12	0	87	24.87	134	89	17	1.23	71	1.851	53.884	1.731	4	1.39	0.143	1.9	1.43	0.155	0.87	25	71	7.59	0.88			15123.3	8297.4	0.624	0.371	0.646	0.354	24.3	13.9	1.143	8142	7.54
2	0	30	1	1	1	1		0		0	1		3	6	5	94	28.48	123	74	5.3	0.724	4.2	0.623	0.994	-0.003	4	1.19	0.076	2.6	0.64	-0.194	0.51	12	74	8.28	0.918	2.17	0.336	13569	2425.3	0.646	0.391	0.848	0.152	23.1	45.5	1.658	5629	4.42
2	0	30	1	1	1	1		0		0	1		1	4	0	91	23.58	122	75	5.4	0.732	8.4	0.924	2.025	0.306	5	1.05	0.021	3.5	1.05	0.021	0.55	12	63	12.45	1.095	5.89	0.77	16920.3	4002.5	0.652	0.39	0.809	0.191	35.4	15.2	1.182	8036	6.45
2	0	52	1	1	1	1		0	0	0	1		1	4	0	92	28.02	168	89	5.4	0.732	3.2	0.505	0.771	-0.113	5	1.36	0.134	2.9	1.38	0.14	0.37	16	67	6.3	0.799	1	-0.002	17067.3	4176.9	0.649	0.379	0.803	0.197	40	85.1	1.93	6992	6.25
2	0	59	1	1	2	1		0	0	0	1	1	2	9	2	82.5	20.56	132	73	10.8	1.033	3.9	0.591	1.88	0.274	5.2	2.05	0.312	2.9	0.54	-0.268	0.6	21	57	19.99	1.301	12.85	1.109	11106.4	5664.4	0.62	0.395	0.662	0.338	33.3	56.1	1.749	4449	6.01
2	0	22	1	1	1	1		0		0	1		3	5	0.1	76.5	21.02	135	70	5	0.699	2.8	0.447	0.625	-0.204	5.3	2.16	0.334	2.8	0.9	-0.046	0.39	19	69	17.94	1.254	8.34	0.921	20455.1	5501	0.611	0.405	0.788	0.212	34.4	24.6	1.391	5025	7.36
2	0	45	1	1	1	1		0	0	0	1		3	20	10	88	26.72	148	88	6.6	0.82	7	0.845	2.063	0.314	5	1.34	0.127	3.2	1.82	0.26	0.53	33	70	6.72	0.828	1.65	0.217	16103.1	2093.4	0.669	0.428	0.885	0.115	41.9	19.5	1.29	6814	6.86
2	0	44	1	1	1	1		0	0	0	1		2	7	10	77.5	19.83	123	72	5.6	0.748	4.9	0.69	1.225	0.088	5	1.76	0.246	2.9	0.54	-0.268	0.33	23	72	12.21	1.087	6.21	0.793	17918	5754.9	0.664	0.403	0.757	0.243	36.5	15.5	1.19	6191	7.31
2	0	38	1	1	1	1		0	0	0	1		1	10	0	85	20.07	128	75	4.4	0.643	3.4	0.531	0.668	-0.175	6.6	2.37	0.375	4	0.47	-0.328	0.35	35	70	10.31	1.013	3.05	0.484	17745.2	6685.9	0.573	0.37	0.726	0.274	30.4	17	1.23	6097	6.66
2	0	25	1	1	1	1		0		0	1		3	20	5.5	81.5	22.88	114	55	5.2	0.716	2.9	0.462	0.673	-0.172	3.8	1.83	0.262	1.8	0.33	-0.481	0.69	25	70	7.18	0.856	1.5	0.177	11027.8	2435.8	0.564	0.334	0.819	0.181	18.8	56.6	1.753	6711
2	0	26	1	1	1	1		0		0	1		1	1.5	0	90.5	28.63	151	97	6.4	0.806	9.6	0.982	2.743	0.438	4.3	1.08	0.033	3.1	0.88	-0.056	0.34	27	76	6.86	0.836	1.07	0.029	12928.5	4372.5	0.64	0.386	0.747	0.253	36.4	19.2	1.283	8380
1	0	52	1	1	1	2	47	1	1	1	1		2	0	34	95	24.5	104	70	5.1	0.708	6	0.778	1.366	0.135	3.4	1.52	0.182	1.7	0.74	-0.131	0.13	31	75	10.09	1.004	3.87	0.588	15924.5	8073.6	0.556	0.339	0.664	0.336	21	31.5	1.498	8032	8.78
2	0	52	1	1	1	2	40	1	1	1	1		3	7	30	119.5	36.89	127	75	8.1	0.908	43.8	1.641	15.838	1.2	4.2	1.17	0.068	2.9	1.3	0.114	0.33	95	57	2.14	0.331			16083.2	2391.4	0.57	0.329	0.871	0.129	27	24.4	1.387	9105	8.18
1	0	45	1	1	1	2	38	1	1	1	2		2	1	25	91	30.97	109	71	6	0.778	14.5	1.161	3.884	0.589	3.6	0.67	-0.174	2.4	2.79	0.446	0.36	49	66	3.61	0.558			13722	2348.7	0.637	0.382	0.854	0.146	30	16.3	1.212	6410	4.49
1	0	56	1	2	1	2	51	1	1	1	2		2	1	6	86	24.54	134	91	5.7	0.756	7.8	0.892	1.985	0.298	2.2	1.03	0.013	1.2	0.42	-0.377	0.65	27	65	16.55	1.219	5.55	0.744	19431.7	4710.6	0.57	0.325	0.805	0.195	29	37.5	1.574	6678	6.41
1	0	51	1	1	1	2	45	1	1	1	2		3	10	20	100	28.41	105	71	6.4	0.806	6.8	0.833	1.943	0.288	3.8	1.41	0.149	2	1.27	0.104	0.3	28	72	3.97	0.598	1.28	0.106	25737.6	7750.5	0.657	0.414	0.769	0.231	29	12.4	1.093	5230	4.53
1	0	49	1	1	1	2	47	1	1	1	1		2	2	2	80	23.09	140	79	5	0.699	5.7	0.756	1.272	0.105	3.2	1.24	0.093	1.5	0.93	-0.032	0.29	32	81	10.26	1.011	3.76	0.575	16795.7	4378	0.633	0.378	0.793	0.207	26.4	17	1.23	6372	6.3
1	0	43	1	1	1	2	41	1	1	1	1		2	15	23	95	26.28	137	87	5.4	0.732	2.6	0.415	0.627	-0.203	4.3	1.19	0.076	2.7	0.96	-0.018	0.89	29	68	10.34	1.015	5.7	0.756	19528.1	2135.6	0.672	0.402	0.901	0.099	40.4	25.7	1.41	8956	5.79
1	0	57	1	2	1	2	56	1	1	1	2		1	0	0	90	27.72	159	86	6.2	0.792	5	0.699	1.384	0.141	3.4	1.17	0.068	1.8	0.89	-0.051	0.41	17	87	7.14	0.854	1.32	0.121	11393.1	4010.5	0.595	0.353	0.74	0.26	33.3	14.9	1.173	3069	4.55
2	0	53	2	1	1	1		0	0	0	1		2	14	30	95	28.72	122	84	5.9	0.771	7	0.845	1.844	0.266	5.9	1.18	0.072	4	2.31	0.364	0.31	40	78	3.99	0.601	1.1	0.04	15599.1	3618.9	0.517	0.311	0.812	0.188	41	70.9	1.851	8435	5.8
2	0	57	2	1	1	1		0	0	0	1		3	4	57	101.5	26.31	142	89	6.7	0.826	8.8	0.944	2.632	0.42	4	1	0	2.6	1.82	0.26	0.44	34	66	4.54	0.657	1.09	0.036	18233.6	3003.6	0.547	0.295	0.859	0.141	33	44.6	1.649	6123	7.52
2	0	58	2	1	1	1		0	0	0	1		3	18	40	99	27.36	133	91	5.7	0.756	4.6	0.663	1.171	0.068	5.6	1.05	0.021	3.7	3.32	0.521	0.43	19	73	5.28	0.723	1.68	0.225	23583.1	2664.6	0.687	0.439	0.898	0.102	38	21.7	1.336	9185	5.82
2	0	77	2	1	1	1		0	0	0	1		2	3	10	97	28.19	151	79	6.1	0.785	9.9	0.996	2.696	0.431	4.9	1.34	0.127	3.4	0.67	-0.174	0.58	20	71	12.61	1.101	4.29	0.633	17618.7	5204	0.65	0.391	0.772	0.228	23.6	45.1	1.654	6620	8.02
2	0	40	2	1	1	1		0	0	0	1		1	18	0	95	25.06	125	91	5.7	0.756	8	0.903	2.036	0.309	6.5	1.32	0.121	4.2	2.27	0.356	0.47	20	74	4.09	0.612	1.24	0.094	20319.8	1220.7	0.625	0.407	0.943	0.057	24.9	13.3	1.124	7487	4.66
2	0	40	2	1	1	1		0	0	0	1		2	2	16	94.5	25.94	139	81	5.5	0.74	7.7	0.886	1.891	0.277	6.4	1.23	0.09	4.2	2.36	0.373	0.45	33	63	5.64	0.751	0.37	-0.431	15703.8	4206.8	0.655	0.366	0.789	0.211	25.5	18.1	1.258	6284	5.64
2	0	60	2	2	1	1		0	0	0	2		1	3	0	112	30.23	141	79	6	0.778	9.4	0.973	2.518	0.401	6.7	1.11	0.045	5.1	1.38	0.14	0.61	20	62	8.87	0.948	2.82	0.451	14598.7	3511.8	0.697	0.405	0.806	0.194	38.3	12.1	1.083	5124	5.49
2	0	68	2	1	1	1		0	0	0	1		2	5	15	111	30.52	185	89	6.4	0.806	7.1	0.851	2.029	0.307	5.2	2.24	0.35	2.9	0.62	-0.208	1.54	24	64	14.66	1.166	5.76	0.76	20842.1	9702.5	0.602	0.4	0.682	0.318	22.3	13.3	1.124	6780	10.43
2	0	38	2	1	1	1		0	0	0	1		3	15	11.6	99	30.14	123	71	6.2	0.792	5.1	0.708	1.412	0.15	6	0.77	-0.114	4.7	2.23	0.348	0.5	42	82	7.29	0.863	2.13	0.329	13120.7	990.3	0.614	0.387	0.93	0.07	28.4	50.9	1.707	4769
2	0	48	2	1	1	1		0	0	0	1		1	8	0	97	28.15	139	78	6.5	0.813	5.2	0.716	1.509	0.179	4.6	1	0	2.6	1.87	0.272	0.54	31	72	6.11	0.786	1.23	0.091	19128.8	1708.2	0.591	0.347	0.918	0.082	29.8	6.8	0.833	7744
1	0	49	2	2	1	2	44	1	1	1	1		2	24	28	117	33.07	126	83	6.5	0.813	19.3	1.286	5.6	0.748	4	1.1	0.041	2.3	2.36	0.373	0.6	50	70	5.06	0.704	0.74	-0.129	15663.1	3606.3	0.56	0.336	0.813	0.187	32	72	1.857	8274	6.54
1	0	47	2	2	1	2	42	1	1	1	2		2	0	28	105	30.01	151	87	6.6	0.82	15.5	1.19	4.567	0.66	3.5	0.92	-0.036	2.2	0.97	-0.013	0.97	45	79	6.29	0.798	2.2	0.342	14668.7	2843.8	0.559	0.308	0.838	0.162	31	33	1.519	3420	5.24
1	0	56	2	2	1	2	51	1	1	1	2		2	6	35	115.5	33.59	172	102	5.4	0.732	13.5	1.13	3.254	0.512	4.6	1.1	0.041	3.1	2.21	0.344	0.47	40	71	4.15	0.618	1.31	0.118	16566.3	3544.8	0.584	0.336	0.824	0.176	20	38.9	1.59	6879	7.11
1	0	59	2	1	1	2	54	1	1	1	1		3	0	25	129	39.19	99	65	7.9	0.898	13.4	1.127	4.726	0.674	4.2	1.29	0.111	1.8	2.36	0.373	0.7	24	78	5.84	0.767	2.32	0.366	21348.4	2963.4	0.573	0.327	0.878	0.122	25	55.3	1.743	5686	4.98
1	0	48	2	1	1	2	43	1	1	1	2		3	2	35	110	30.45	114	73	5.7	0.756	17.7	1.248	4.504	0.654	3.9	0.84	-0.076	2.7	1.4	0.146	0.18	23	69	2.98	0.475			18762.4	3568.3	0.621	0.352	0.84	0.16	29	68.9	1.838	5243	4.63
1	0	55	2	1	1	2	51	1	1	1	1		3	4	52	103	29.94	131	79	5.7	0.756	11.8	1.072	3.003	0.478	3.6	0.81	-0.092	2.2	2.31	0.364	0.35	28	54	2.72	0.434			19137.8	2428.5	0.599	0.342	0.887	0.113	27	25	1.398	6397	4.77
1	0	57	2	1	1	2	51	1	1	1	1		2	0	33	100.5	26.54	165	104	6.4	0.806	11.6	1.064	3.314	0.52	4.3	1.08	0.033	2.9	1.49	0.173	0.53	37	72	5.46	0.737	1.17	0.068	19006	4597.9	0.613	0.353	0.805	0.195	34	12	1.079	7134	9.06
2	0	58	2	2	1	2	54	1	1	0	2		1	2	0	100.5	28	122	75	6.7	0.826	13.9	1.143	4.158	0.619	5.3	1.12	0.049	4	0.93	-0.032	0.35	83	68	5.48	0.739	1.65	0.217	18582.6	4196.2	0.617	0.353	0.816	0.184	44	11.4	1.057	8918	7.85
1	0	53	2	2	1	2	51	1	1	1	2		3	0	21	96.5	31.11	129	85	6.9	0.839	5.9	0.771	1.817	0.259	2.7	0.73	-0.137	1.7	1	0	0.44	21	70	4.18	0.621	1.12	0.049	22619.1	3457.3	0.666	0.422	0.867	0.133	39	45	1.653	4868	3.48
2	0	46	2	2	1	2	40	1	1	1	1		3	3	23	104	27.87	122	75	6.8	0.833	10.5	1.021	3.188	0.503	3.5	0.85	-0.071	2.4	0.83	-0.081	0.23	29	53	4.11	0.614	0.98	-0.01	22331.7	3209.4	0.692	0.436	0.874	0.126	37	24.5	1.389	6544	4.39
2	0	57	2	2	1	2	44	1	1	1	2		2	0	14	104	28.3	131	76	6.3	0.799	10.6	1.025	2.981	0.474	4.5	0.97	-0.013	3.1	1.92	0.283	0.22	45	61	4.43	0.646	1.23	0.089	28270.8	2896.2	0.647	0.411	0.907	0.093	37	25.5	1.407	7616	5.23
1	0	48	2	2	1	2	43	1	1	1	1		2	4	25	125	36.79	115	68	5.3	0.724	19.1	1.281	4.519	0.655	3.3	0.8	-0.097	2.1	2.14	0.33	0.54	39	65	3.86	0.587	1.45	0.162	20081.3	3071.5	0.681	0.418	0.867	0.133	23.8	41.4	1.617	5770	4.12
1	0	36	2	2	1	2	32	1	1	1	2		3	4	17	97	26.19	117	82	5.2	0.716	11	1.041	2.554	0.407	4	0.69	-0.161	2.6	3.26	0.513	0.44	32	61	2.88	0.459	0.75	-0.127	15228.2	1763.3	0.645	0.42	0.896	0.104	35.4	32.1	1.507	3912	2.48
2	0	57	2	2	1	2	42	1	1	1	1		3	3	20	108	31.34	146	90	6.1	0.785	21.2	1.326	5.773	0.761	4.4	1.18	0.072	2.6	2.37	0.375	0.4	22	69	3.54	0.549	0		18192.1	3656.2	0.703	0.406	0.833	0.167	32.5	66.5	1.823	5487	6.13
1	0	57	2	1	1	2	55	1	1	1	2		2	4	40	100.5	26.79	131	76	6.8	0.833	12.9	1.111	3.916	0.593	3.9	0.8	-0.097	2.3	2.13	0.328	0.5	22	91	4.53	0.656	0.41	-0.386	8579.8	1650.3	0.639	0.397	0.839	0.161	23.1	10.4	1.017	7115	3.93
1	0	49	2	1	1	2	48	1	1	1	2		2	0	27	107	30.83	135	74	5.8	0.763	20.6	1.314	5.334	0.727	2.9	0.9	-0.046	1.5	1.33	0.124	0.36	40	71	5.21	0.717	1.55	0.191	14005.7	3234	0.689	0.419	0.812	0.188	36.6	59.4	1.774	6336	3.93
1	0	52	2	1	1	2	50	1	1	1	2		2	8	29	105	28.25	156	91	5.9	0.771	8.6	0.934	2.265	0.355	5.3	1.24	0.093	3.3	1.67	0.223	0.26	21	74	5.71	0.756	1.68	0.224	16819.8	4365.7	0.646	0.385	0.794	0.206	41.9	80.8	1.907	4961	6.07
1	0	57	2	1	1	2	55	1	1	1	2		1	0	0	100	29.29	141	78	6.5	0.813	3.8	0.58	1.103	0.042	4.3	1.06	0.025	2.8	1.14	0.057	0.55	25	67	6.55	0.816	0.89	-0.052	15979.3	4576.6	0.647	0.388	0.777	0.223	40.4	55.9	1.747	5378	7.59
2	0	51	2	1	2	2	38	1	1	0	1	1	3	0.4	11.3	102	29.72	115	66	6.8	0.833	8.4	0.924	2.55	0.407	4.4	0.98	-0.009	3.3	1.1	0.041	0.34	56	59	5.85	0.767	1.25	0.096	17403.9	1089.6	0.646	0.421	0.941	0.059	30.9	40.2	1.604	5019
1	0	49	2	1	1	2	46	1	1	1	1		1	3	0	106	31.64	128	86	5.8	0.763	14	1.146	3.625	0.559	4.4	1.13	0.053	2.7	2.78	0.444	0.68	35	81	9.09	0.958	3.36	0.526	16112	2.8	0.658	0.458	1	0	30	88.2	1.945	5640
1	0	50	2	2	1	2	48	1	1	1	2		2	15	0	101	29.73	135	77	6.7	0.826	11.9	1.076	3.559	0.551	3.9	0.9	-0.046	2.3	2.05	0.312	0.34	30	58	7.59	0.88	2.03	0.307	13528.1	1932.1	0.625	0.365	0.875	0.125	30.2	54.4	1.736	5215
2	0	60	2	2	2	2	50	1	1	0	2	1	2	18		102.5	28.7	112	68	6.6	0.82	7.2	0.857	2.121	0.327	8.3	1.15	0.061	7	1.18	0.072	0.44	29	53	11.06	1.044	4.66	0.669	15988.2	2246.8	0.637	0.385	0.877	0.123	37.5	67.1	1.827	4026
2	0	70	2	2	1	2	61			1	2		3	4	36	103	29.1	106	66	6.7	0.826	9.6	0.982	2.871	0.458	4.7	1.36	0.134	3	1.42	0.152	0.25	21	62	5.87	0.769	1.68	0.227	24551.2	5224.1	0.64	0.408	0.825	0.175	47	13.7	1.137	7295	5.07
2	1	56	1	2	1	1			0	0	2		1	2	0	83	27.15	123	77	5.4	0.732	4.5	0.653	1.085	0.035	6.4	1.74	0.241	4.1	1.37	0.137	0.39	22	58	13.94	1.144	4.58	0.661	19105.5	7662.1	0.533	0.317	0.714	0.286	28	59.4	1.774	10004	7.75
2	1	37	1	1	1	1			0	0	1		1	4	0	75.5	23	113	74	4.8	0.681	6	0.778	1.286	0.109	5.7	2.18	0.338	3.3	0.81	-0.092	0.49	13	61	10.22	1.01	4.77	0.679	16438.2	8131.4	0.563	0.337	0.669	0.331	30	16.5	1.217	7295	9.38
2	1	67	1	1	1	2	57		1	1	1		1	0	0	93	26.7	130	73	5.2	0.716	12	1.079	2.786	0.445	4	1.38	0.14	2.2	0.96	-0.018	0.47	16	75	7.87	0.896	2.41	0.383	22377.7	9039.9	0.612	0.367	0.712	0.288	25	16.7	1.223	5297	7.77
2	1	49	1	1	1	1			0	0	1		1	1	0	113	36.95	122	86	5	0.699	11.7	1.068	2.612	0.417	3.4	0.92	-0.036	2.3	0.99	-0.004	0.55	25	62	5.97	0.776	1.93	0.285	19325.2	3571.8	0.619	0.353	0.844	0.156	22	9.8	0.991	5256	5.29
2	1	55	1	2	1	1			0	0	2		2	1	6	88	27.39	154	102	5.4	0.732	5.8	0.763	1.398	0.146	4.6	1.35	0.13	2.9	0.91	-0.041	0.71	35	51	9.56	0.981	2.83	0.453	16192.8	6688	0.558	0.315	0.708	0.292	37	54.6	1.737	5820	7.75
2	1	37	1	1	1	1			0	0	1		2	8	12	88	26.88	153	104	5.1	0.708	5.5	0.74	1.252	0.098	4.7	1.7	0.23	2.9	0.61	-0.215	0.3	10	69	4.36	0.639	1.15	0.06	20790.4	7563.9	0.606	0.402	0.733	0.267	37	8	0.903	9293	7.9
2	1	49	1	1	1	1			0	0	1		1	0	0	69	19.91	135	86	5.1	0.708	3.5	0.544	0.797	-0.099	4.8	1.77	0.248	2.9	0.41	-0.387	0.91	14	61	9.63	0.984	5.01	0.7	22561.8	9756.8	0.608	0.385	0.698	0.302	34	31.5	1.498	5042	6.12
2	1	24	1	1	1	1				0	1		1	0	0	72.5	20	105	70	5.1	0.708	5	0.699	1.138	0.056	5.5	1.25	0.097	4.1	0.94	-0.027	0.37	26	53	6.27	0.797	3.14	0.497	22041	3483.1	0.645	0.412	0.864	0.136	39	48.9	1.689	8716	6.4
2	1	45	1	1	1	1			0	0	1		1	2	0	67	21.13	110	72	5.4	0.732	4.7	0.672	1.133	0.054	3.5	1.27	0.104	2.1	0.63	-0.201	0.21	18	64	8.01	0.904	4.05	0.607	16342.4	4204.9	0.562	0.322	0.795	0.205	21.7	8.5	0.929	5469	4.53
2	1	53	1	1	1	1			0	0	1		1	1	0	73	20.38	119	72	5.5	0.74	5.8	0.763	1.424	0.154	4.5	1.81	0.258	2.5	0.71	-0.149	0.49	24	55	12.66	1.103	4.23	0.627	17117.3	6229.5	0.599	0.351	0.733	0.267	21.6	77.2	1.888	6514	5.7
2	1	22	1	1	1	1				0	1		1	6	0	69	22.15	119	80	5.7	0.756	14.9	1.173	3.792	0.579	4.4	1.99	0.299	2.4	0.82	-0.086	0.79	12	59	9.1	0.959	4.42	0.646	24201	11752	0.633	0.375	0.673	0.327	12	168.6	2.227	3911	3.9
2	1	51	1	1	1	1			0	0	1		1	0	0	90	31.43	156	100	5.2	0.716	7.4	0.869	1.718	0.235	6.3	1.34	0.127	4.5	1.18	0.072	0.97	17	67	7.35	0.866	1.87	0.271	18074.6	4424.2	0.595	0.348	0.803	0.197	24.2	12	1.079	5912	6.41
2	1	77	1	2	1					0	2		2	1	12	82	22.21	171	110	5.3	0.724	6.6	0.82	1.562	0.194	4.6	1.53	0.185	2.9	0.46	-0.337	0.72	11	61	23.95	1.379	15.36	1.186	15427.8	6728.7	0.615	0.368	0.696	0.304	30.9	8.7	0.94	6903	5.13
2	1	26	1	1	1	1				0	1		1	8	0	77	22.19	110	69	4.3	0.633	4.4	0.643	0.845	-0.073	4.3	2.37	0.375	1.7	0.64	-0.194	0.61	8	62	30.7	1.487	16.6	1.22	19053.8	9508.1	0.598	0.362	0.667	0.333	28.1	66.2	1.821	7558	5.56
2	1	21	1	1	1	1				0	1		3	10	3	80	21.9	110	60	4.8	0.681	6.6	0.82	1.414	0.151	3.9	1.51	0.179	2.1	0.83	-0.081	0.53	7	51	13.01	1.114	5.17	0.714	18573.7	7003.9	0.623	0.37	0.726	0.274	25.5	13.6	1.134	5806	7.07
2	1	30	1	1	1	1				0	1		3	10	13	78	24.21	113	64	5	0.699	6.2	0.792	1.384	0.141	5	1.68	0.225	2.7	1.42	0.152	0.7	10	55	23.98	1.38	12.63	1.101	17910.2	4069.4	0.645	0.391	0.815	0.185	27.4	56.6	1.753	6815	5.44
2	1	35	1	1	1	1				0	1		3	10	15	102	31.26	111	73	5.4	0.732	17.8	1.25	4.291	0.633	4.8	1.43	0.155	3.2	1.01	0.004	0.26	15	56	7.68	0.886	2.98	0.474	15950.3	3791.5	0.622	0.375	0.808	0.192	24.7	75.5	1.878	5199	4.22
2	1	30	1	1	1	1				0	1		1	0	0	121	46.1	114	72	5.7	0.756	26.7	1.427	6.794	0.832	4.7	1.61	0.207	2.7	1.22	0.086	0.66	17	71	7.51	0.876	2.45	0.389	19272.1	5411.5	0.667	0.401	0.781	0.219	33.7	18.5	1.267	3474	5.07
2	1	70	1	2	2	2	68			1	2	1	1	5	0	79.5	24.03	140	47	16	1.204	8	0.903	5.714	0.757	4.2	1.56	0.193	2.4	0.85	-0.071	1.81	19	64	26.01	1.415	14.8	1.17	17141.7	7277.6	0.683	0.427	0.702	0.298	27.9	26.9	1.43	5762	8.5
2	1	62	1	1	1	1			0	0	1		1	0.3	0	92	28.41	111	68	5.9	0.771	11.4	1.057	3.003	0.478	5.2	2.4	0.38	2.7	0.44	-0.357	0.76	35	59	19.46	1.289	8.14	0.911	17315.9	11189.8	0.631	0.396	0.607	0.393	31.3	15.5	1.19	5909	7.18
2	1	72	1	2	1	1				1	2		1	0.3	0	79.5	24.79	149	42	4.8	0.681	5.2	0.716	1.114	0.047	4.3	1.85	0.267	2.4	0.58	-0.237	0.37	34	61	18.09	1.257	9.52	0.979	17934.4	10302	0.61	0.401	0.635	0.365	29.1	17.1	1.233	5025	6.79
2	1	47	1	1	1	1			0	0	1		1	0.5	0	90.5	31.41	112	76	5.2	0.716	4.9	0.69	1.138	0.056	6.3	1.53	0.185	4.8	1.09	0.037	0.59	33	64	13.17	1.119	5.67	0.753	11079	1818.9	0.648	0.406	0.859	0.141	30.9	21.8	1.338	4811	5.44
2	1	26	1	1	1	1				0	1		1	3	0	70.5	20.63	132	85	4.6	0.663	6	0.778	1.232	0.091	4.1	1.97	0.294	1.8	1.39	0.143	0.52	18	62	14.7	1.167	7.3	0.863	18858.9	6060.9	0.664	0.419	0.757	0.243	31.2	14.9	1.173	6673	7.49
2	1	45	1	1	1	1			0	0	1		3	2	0	87	26.22	111	74	5.1	0.708	4.8	0.681	1.093	0.039	4.7	1.51	0.179	2.9	0.65	-0.187	0.57	24	59	11.83	1.073	5.65	0.752	13592.1	5398.4	0.633	0.39	0.716	0.284	28.5	63.9	1.806	5641	6.76
2	1	41	1	1	1	1			0	0	1		2	0.7	8	92	25.87	126	79	5.5	0.74	10	1	2.455	0.39	5	1.13	0.053	3.5	0.91	-0.041	0.56	17	69	7.69	0.886	2.37	0.374	17262.3	3265.6	0.628	0.382	0.841	0.159	26.1	9.2	0.964	4837
2	1	44	1	1	1	1			0	0	1		1	0.5	0	73	20.35	122	75	5.9	0.771	7.6	0.881	2.002	0.301	5.4	1.38	0.14	3.7	0.78	-0.108	0.76	17	66	6.81	0.833	1.54	0.188	13619.7	3351.6	0.598	0.338	0.803	0.197	27	11.5	1.061	4726
2	1	62	1	1	1	1			0	0	1		2	3	10	83	23.99	145	80	5.5	0.74	4.1	0.613	1.007	0.003	4.2	1.52	0.182	2.7	0.32	-0.495	0.58	16	83	9.58	0.981	3.08	0.488	11667.5	2357.3	0.543	0.303	0.832	0.168	24.1	19.2	1.283	6885
2	1	37	1	1	1	1			0	0	1		1	0	0	81.5	24.91	120	89	6.7	0.826	14.4	1.158	4.307	0.634	5.7		0.061	4.2	0.97	-0.013	0.75	12	60	7.58	0.879	2.2	0.342	13180.1	4748.5	0.635	0.357	0.735	0.265	34.8	56.5	1.752	7562
2	1	35	1	1	1	1			0	0	1		1	0.9	0	98.5	27.67	134	89	7	0.845	7.4	0.869	2.313	0.364	3.9	1.35	0.13	2.3	0.74	-0.131	0.53	23	61	7.83	0.894	2.2	0.342	13896	5671.7	0.601	0.345	0.71	0.29	33.6	16.1	1.207	7137
2	1	55	2	2	1	1			0	0	2		1	1	0	94	30.66	99	65	7.1	0.851	14.5	1.161	4.596	0.662	6	1.63	0.212	4.1	1.07	0.029	0.8	40	43	10.74	1.031	3.84	0.584	15228.9	5064.6	0.467	0.279	0.75	0.25	36	57.8	1.762	10098	7.5
2	1	75	2	2	1	1				0	1		1	3	0	87	27.36	116	67	6.4	0.806	9.2	0.964	2.629	0.42	4.8	1.59	0.201	2.8	0.96	-0.018	0.63	34	63	19.84	1.298	7.77	0.89	20033.6	9577.4	0.573	0.339	0.677	0.323	24	16.7	1.223	8958	8.06
2	1	73	2	1	1	2	54			1	2		1	1	0	101	31.68	157	66	5.8	0.763	10.6	1.025	2.745	0.438	4.7	1.7	0.23	2.3	1.24	0.093	0.41	15	110	8.86	0.947	3.49	0.543	23934.4	10546.4	0.615	0.362	0.694	0.306	30	17.5	1.243	7389	8.95
2	1	64	2	2	1					1	1		1	1	0	94	29.01	162	82	5.7	0.756	8.2	0.914	2.087	0.319	4.5	1.52	0.182	2.4	1.03	0.013	0.43	24	68	9.22	0.965	2.38	0.376	19309.4	7328.6	0.593	0.356	0.725	0.275	20	12.4	1.093	7134	7.51
1	1	55	2	2	1	2	51		1	1	1		3	1	20	102.5	30.82	139	84	5.6	0.748	8.6	0.934	2.15	0.332	3.2	1.17	0.068	1.7	1.08	0.033	0.47	21	57	7.06	0.849	2.87	0.457	20584.9	3422.7	0.554	0.306	0.857	0.143	22	16.3	1.212	5270	6.15
2	1	39	2	2	1	1			0	0	2		2	0	15	98	35.83	120	78	6	0.778	16.8	1.225	4.5	0.653	5.2	1.54	0.188	3.3	1.76	0.246	0.57	21	47	4.96	0.696	1.26	0.1	16518.4	3400	0.553	0.341	0.829	0.171	34	31.1	1.493	6625	7.27
2	1	66	2	2	1	1			0	0	1		2	1	10	92.5	29.84	141	76	5.9	0.771	7.3	0.863	1.923	0.284	5.9	1.48	0.17	4.1	1.68	0.225	0.42	49	59	6.73	0.828	2.5	0.398	20520.6	5520.9	0.624	0.366	0.788	0.212	35	34	1.531	6289	7.31
2	1	68	2	2	2	2	60			1	2	1	1	0	0	108	33.38	126	73	9.9	0.996	142.2	2.153	62.847	1.798	4.1	1.26	0.1	2.4	1.44	0.158	0.58	36	45	4.26	0.63	1.12	0.049	18716.7	5921.7	0.616	0.347	0.76	0.24	41	13.9	1.143	5860	8.86
2	1	23	2	1	1	1				0	1		3	3	1	93.5	28.58	105	70	5.8	0.763	5.2	0.716	1.346	0.129	3.7	1.28	0.107	2.1	1.28	0.107	0.26	12	57	6.19	0.792	1.7	0.231	19874	3779.7	0.538	0.325	0.84	0.16	35	15.7	1.196	8649	6.08
2	1	40	2	1	1	1			0	0	1		1	1	0	83	25.03	112	60	5.3	0.724	5	0.699	1.183	0.073	4.1	0.98	-0.009	2.7	1.75	0.243	0.77	19	57	8.59	0.934	4.61	0.664	20264.4	2812.2	0.652	0.387	0.878	0.122	29.7	12	1.079	5115	4.5
2	1	58	2	2	2	2	57		1	1	2	1	1	0	0	111	36.16	134	69	6.6	0.82	15.1	1.179	4.449	0.648	3.6	0.96	-0.018	2.4	1.47	0.167	0.42	31	59	4.23	0.627	0.94	-0.028	21976.7	3747.6	0.646	0.375	0.854	0.146	22.2	35.8	1.554	6177	4.77
2	1	61	2	2	1	1			0	0	2		1	0	0	83	25.7	151	86	5.6	0.748	5.7	0.756	1.425	0.154	6.5	1.73	0.238	4.5	1.21	0.083	0.44	14	52	16.36	1.214	7.39	0.869	13456.7	7543.6	0.652	0.392	0.641	0.359	29.9	17.6	1.246	7576	4.49
2	1	72	2	2	2	2	69			1	2	1	2	2	30	95	27.51	135	60	7.4	0.869	28.5	1.455	9.415	0.974	3.6	0.99	-0.004	2.2	1.9	0.279	1.18	61	79	8.23	0.915	2.39	0.379	16361	3378.3	0.622	0.339	0.829	0.171	38.5	69.4	1.841	7115	6.12
2	1	55	2	2	1	1			0	0	1		1	0	0	81	24.07	121	74	6.4	0.806	4.5	0.653	1.286	0.109	5.7	1.32	0.121	3.8	0.97	-0.013	0.56	29	48	14.51	1.162	9.84	0.993	13954.3	4628.2	0.586	0.331	0.751	0.249	32.7	62	1.792	4596	6.15
2	1	67	2	2	2	1			0	1	2	1	1	3	0	107	33.68	149	67	7.6	0.881	10.4	1.017	3.529	0.548	2.8	1.42	0.152	0.8	1.38	0.14	0.89	14	63	15.27	1.184	7.28	0.862	16380.3	3668.6	0.612	0.351	0.817	0.183	29.1	101.2	2.005	5373	6.87
2	1	78	2	2	1	1				0	2		1	0	0	100	39.21	181	71	6.5	0.813	11.3	1.053	3.279	0.516	6	2.86	0.456	2.7	1.18	0.072	0.75	15	70	17.96	1.254	4.71	0.673	13884.6	7878.3	0.585	0.373	0.638	0.362	30.7	15.5	1.19	6780	9.5
2	1	42	2	2	1	1			0	0	1		3	10	3	105	36.76	140	95	5.9	0.771	21.7	1.336	5.716	0.757	5.9	1.45	0.161	3.9	2.96	0.471	0.76	32	55	12.09	1.083	3.37	0.528	17625.7	2202.8	0.634	0.388	0.889	0.111	32.1	28	1.447	6526	7.11
2	1	46	2	1	1	1			0	0	1		1	0.6	0	92	26.97	129	84	5.3	0.724	10.5	1.021	2.484	0.395	3.9	0.98	-0.009	2.4	2.1	0.322	0.41	29	56	5.08	0.706	0.44	-0.36	18553.1	4171.5	0.567	0.317	0.816	0.184	31.7	39.8	1.6	4354
2	1	67	2	2	1	1			0	1	2		1	2.5	0	90	28.9	145	74	5.5	0.74	10.5	1.021	2.578	0.411	4.7	1.67	0.223	2.7	1.34	0.127	0.47	27	66	11.78	1.071	3.55	0.55	18498.6	3852.7	0.554	0.337	0.828	0.172	26.7	9.8	0.991	7422
2	1	46	2	1	1	1			0	0	1		1	1	0	88	29.56	142	82	5.9	0.771	8.7	0.94	2.292	0.36	7	1.19	0.076	5.5	1.07	0.029	0.63	18	66	6.5	0.813	1.53	0.185	17606.6	2307.4	0.598	0.353	0.884	0.116	32	53.1	1.725	6049
2	1	45	2	2	2	1			0	0	2	0	3	15	6.3	105.5	32.79	142	90	6.7	0.826	17.3	1.238	5.175	0.714	4.5	1.04	0.017	2.9	1.88	0.274	0.67	41	49	4.61	0.663	0.53	-0.277	21292.2	936.4	0.61	0.389	0.958	0.042	33.7	66.5	1.823	7386
2	1	52	2	1	1	1			0	0	1		1	1	0	84	25.6	115	71	6.2	0.792	5.9	0.771	1.633	0.213	4.9	1.08	0.033	3.3	1.02	0.009	0.73	27	63	7.64	0.883	1.81	0.257	17087.4	3448.1	0.606	0.344	0.832	0.168	34.7	8.7	0.94	4554
2	1	67	2	2	1	2	56		1	1	2		1	0	0	97	32.33	135	71	6.2	0.792	22.1	1.344	6.117	0.787	4.8	1.41	0.149	2.7	1.84	0.265	0.65	21	75	9.46	0.976	2.56	0.408	15233.6	1982.5	0.644	0.374	0.885	0.115	25.6	19.5	1.29	4569
2	1	38	2	1	1	1			0	0	1		1	6	0	88	28.69	126	85	5.6	0.748	6.8	0.833	1.7	0.23	3.9	1.69	0.228	2	0.52	-0.284	0.53	15	78	7.67	0.885	2.35	0.372	11171.3	1889.4	0.628	0.383	0.855	0.145	21.7	76.4	1.883	4316
2	1	35	2	1	1	1				0	1		3	0.8	0.4	110	34.97	113	85	5.7	0.756	18.8	1.274	4.784	0.68	4.2	1.22	0.086	2.4	1.74	0.241	0.53	28	62	7.6	0.881	2.32	0.365	14326.8	3272.5	0.627	0.387	0.814	0.186	30.8	75.9	1.88	6192
[truncated: 58 more columns]
